# Supplementary material for: Realization of deep-blue TADF in sterically controlled naphthyridines for vacuum- and solution-processed OLEDs
Source: Royal Society of Chemistry journal article supplement (doi:10.1039/d0tc01637c), 2020-01-01
Supplement: d0tc01637c1.pdf [file d0tc01637c1.pdf]

## Electronic supplementary information (ESI)

# Realization of deep-blue TADF in sterically controlled naphthyridines for vacuum- and solution-processed OLEDs

Gediminas Kreiza<sup>a</sup>, Dovydas Banevičius<sup>a</sup>, Justina Jovaišaitė<sup>a</sup>, Saulius Juršėnas<sup>a</sup>, Tomas Javorskis<sup>b</sup>, Vytenis Vaitkevičius<sup>b</sup>, Edvinas Orentas<sup>b</sup>, Karolis Kazlauskas<sup>\*a</sup>

E-mail: [karolis.kazlauskas@ff.vu.lt](mailto:karolis.kazlauskas@ff.vu.lt)

<sup>a</sup>*Institute of Photonics and Nanotechnology, Vilnius University, Saulėtekio av. 3, LT-10257 Vilnius, Lithuania*

<sup>b</sup>*Department of Organic Chemistry, Vilnius University, Faculty of Chemistry and Geosciences, Naugarduko 24, Vilnius LT-03225, Lithuania*

## Synthesis and identification

All reagents and starting materials were obtained from commercial sources and used as received. Reaction solvents, dimethylformamide was distilled from CaH<sub>2</sub>, THF was distilled from sodium/ benzophenone. All moisture-sensitive reactions were performed in oven-dried (230 °C) glassware under an atmosphere of dry argon. Thin-layer chromatography was performed on Merck silica gel plates with QF-254 indicator. Visualization was accomplished with UV (254 nm), potassium permanganate (KMnO<sub>4</sub>), ninhydrin or vanillin. Column chromatography was performed using Merck silica 60 (40–63 μm particle size). <sup>1</sup>H and <sup>13</sup>C NMR spectra were recorded on a NMR spectrometer at 400 MHz for <sup>1</sup>H and 101 MHz for <sup>13</sup>C, respectively. <sup>1</sup>H and <sup>13</sup>C NMR spectra are referenced to residual solvent (CDCl<sub>3</sub>, 7.29 and 77.16 ppm for <sup>1</sup>H NMR and <sup>13</sup>C NMR, respectively). When necessary, assignments were obtained by reference to COSY, HSQC, and HMBC correlations. Chemical shifts are reported in ppm, and multiplicities are indicated by br (broad), s (singlet), d (doublet), t (triplet), q (quartet), quint (quintet), sxt (sextet), sept (septet), m (multiplet), and combinations thereof. Infrared (IR) spectra were recorded on a FTIR spectrometer equipped with a diamond ATR unit. Melting points were determined in open capillary tubes and are uncorrected. HRMS was recorded on Bruker Daltonics microTOF-II spectrometer equipped with ESI ion source in positive mode.

2,7-dichloro-1,8-naphthyridine **1**<sup>1</sup> and 1-bromo-3,6-di-*tert*-butyl-9*H*-carbazole **4**<sup>2</sup> were synthesized according to literature.

Abbreviations: DCM, dichloromethane; DMF, dimethylformamide; dppp, 1,3-bis(diphenylphosphino)propane; EtOAc, ethyl acetate; PE, petrol ether (40–60 °C fraction).

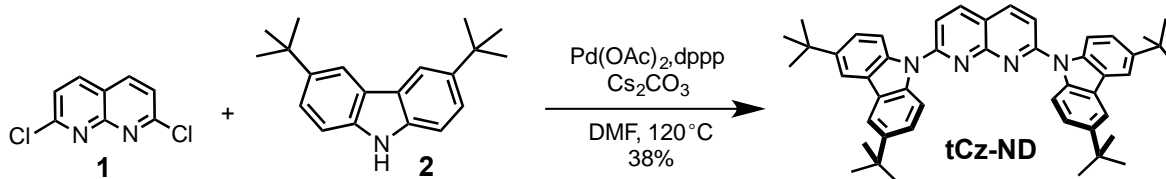

Pd(OAc)<sub>2</sub> (12.2 mg, 5 mol %) and 1,3-bis(diphenylphosphino)propane (dppp) (41.2 mg, 5 mol %) was dissolved in 10 ml DMF at room temperature. After 5 min, 2,7-dichloro-1,8-naphthyridine **1** (100 mg, 1.0 mmol, 1.0 equiv.), 3,6-di-*tert*-butyl-9H-carbazole **2** (765 mg, 3.0 mmol, 3.0 equiv.) and cesium carbonate (1.63 g, 5.0 mmol, 5.0 equiv.) were added. The reaction mixture was heated at 120 °C for 48 h. Reaction was quenched with water. After extraction with CHCl<sub>3</sub>, the crude product was purified by column chromatography (EtOAc/PE 1:60) to afford 263 mg (38%) of **tCz-ND** as a light-yellow solid.

**R<sub>f</sub>** = 0.4 (1/20 EtOAc:PE), m.p. >280°C.

**<sup>1</sup>H NMR** (400 MHz, CDCl<sub>3</sub>) δ 8.36 (d, *J*=8.5, 2H), 8.24 (d, *J*=8.7, 4H), 8.15 (d, *J*=1.9, 4H), 7.96 (d, *J*=8.5, 2H), 7.57 (dd, *J*=8.7, 2.0, 4H), 1.51 (s, 36H);

**<sup>13</sup>C NMR** (100 MHz, CDCl<sub>3</sub>) δ 155.9, 154.8, 144.8, 138.6, 137.7, 125.2, 124.22, 118.2, 116.8, 116.1, 112.2, 34.8, 31.9;

IR: ν<sub>max</sub>/cm<sup>-1</sup> 2954, 1470, 1360, 808;

**HRMS** (ESI) calc. for C<sub>48</sub>H<sub>53</sub>N<sub>4</sub> (M+H): 685.4265; Found: 685.4264.

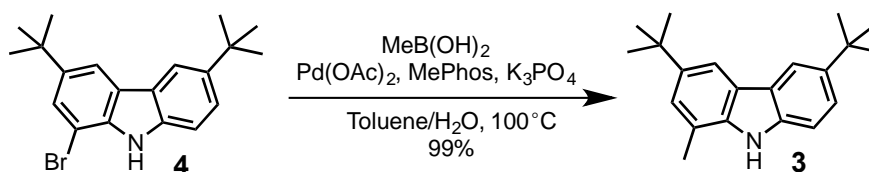

Reaction tube was charged with 1-bromo-3,6-di-*tert*-butyl-9H-carbazole **4** (320 mg, 0.893 mmol, 1.0 equiv.), methylboronic acid (134 mg, 2.239 mmol, 2.5 equiv.), tribasic potassium phosphate (0.76g, 3.58 mmol, 4 equiv.), Pd(OAc)<sub>2</sub> (10 mg, 0.045 mmol, 0.05 equiv.) and MePhos (33 mg, 0.091 mmol, 0.1 equiv.) under argon. Next, degassed solution of toluene/H<sub>2</sub>O (3:1, 10 ml) was added. Screw-capped tube was heated at 100°C for 48h. Filtration through celite pad with EtOAc and purification by column chromatography on silica gel DCM/PE (1:5) afforded 259 mg (99%) of **3** as a yellowish oil.

**R<sub>f</sub>** = 0.29 (1/5 DCM:PE).

**<sup>1</sup>H NMR** (400 MHz, CDCl<sub>3</sub>) δ 8.08-8.10 (m, 1H), 7.94-7.96 (m, 1H), 7.80 (s, 1H), 7.47-7.50 (m, 1H), 7.38-7.41 (m, 1H), 7.29-7.31 (m, 1H), 2.58 (s, 3H), 1.48 (s, 9H), 1.47 (s, 9H);

$^{13}\text{C}$  NMR (100 MHz,  $\text{CDCl}_3$ )  $\delta$  142.5, 142.2, 138.0, 137.5, 124.3, 123.8, 123.4, 122.8, 118.9, 116.3, 113.7, 110.1, 34.7, 34.6, 32.1, 32.0, 17.2;

IR:  $\nu_{\text{max}}/\text{cm}^{-1}$  3421, 2951, 1493, 1296, 865, 805;

HRMS (ESI) calc. for  $\text{C}_{21}\text{H}_{28}\text{N}$  (M+H): 294.2216; Found: 294.2208.

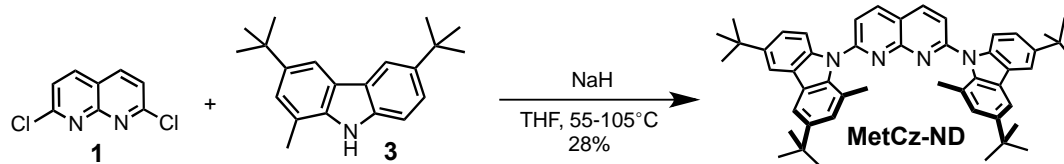

To a solution of **3** (161 mg, 0.549 mmol, 2.2 equiv.) in freshly distilled THF (8.0 ml) NaH (60% dispersion in mineral oil) (30 mg, 0.75 mmol, 3.0 equiv.) was added in one portion under argon. Next, mixture was stirred at 55-60°C for 1.5 h and subsequently cooled to r.t. Afterwards **1** (49 mg, 0.249 mmol, 1.0 equiv.) was added in one portion, tube was screw-capped and heated at 105°C for 96h. Purification by column chromatography on silica gel 1/30 (EtOAc:PE) afforded 49 mg (28%) of **MetCz-ND** as a yellowish solid.

$R_f$  = 0.31 (1/20 EA:PE), m.p. >300°C.

$^1\text{H}$  NMR (400 MHz,  $\text{CDCl}_3$ )  $\delta$  8.34 (d,  $J$  = 8.4 Hz, 2H), 8.10-8.12 (m, 2H), 8.00-8.02 (m, 2H), 7.92 (d,  $J$  = 8.4 Hz, 2H), 7.54 (d,  $J$  = 8.4 Hz, 2H), 7.46-7.50 (m, 2H), 7.31-7.33 (m, 2H), 2.29 (s, 6H), 1.50 (s, 18H), 1.48 (s, 18H);  $^{13}\text{C}$  NMR (100 MHz,  $\text{CDCl}_3$ )  $\delta$  155.6, 155.0, 144.7, 144.6, 140.1, 137.8, 137.7, 127.1, 126.2, 125.0, 124.1, 122.1, 120.7, 119.3, 116.0, 114.0, 111.1, 34.8, 34.6, 31.9, 29.7, 21.3;

IR:  $\nu_{\text{max}}/\text{cm}^{-1}$  2952, 1491, 1446, 1230, 867, 806;

HRMS (ESI) calc. for  $\text{C}_{50}\text{H}_{57}\text{N}_4$  (M+H): 713.4578; Found: 713.4577.

## X-Ray Crystallography

Single crystals of the investigated compounds were grown from DMF solutions by slow evaporation method. Suitable crystals were selected and mounted on a nylon loop in inert oil and analyzed on a XtaLab Synergy diffractometer equipped with HyPix-6000HE hybrid photon counting detector and PhotonJet microfocus X-ray source delivering  $\text{CuK}\alpha$  ( $\lambda = 1.54184$ ) radiation. X-ray measurements were carried out at 100.0 K using Oxford Cryostream 800 cooling system. Data were collected and processed using CrysAlisPro software. Employing Olex2 graphical interface,<sup>3</sup> the structures were solved by Intrinsic Phasing with the ShelXT<sup>4</sup> program and refined with the ShelXL<sup>5</sup> package using Least Squares minimization. It is worth noting that highly disordered solvent molecules in **MetCz-ND** crystal lattice were present. To remove the electronic contribution of solvent molecules from the refinement, solvent masking was applied. The structure files of **tCz-ND** and **MetCz-ND** crystals were deposited with the Cambridge Crystallographic Data Centre (CCDC 1991494; 1992697).

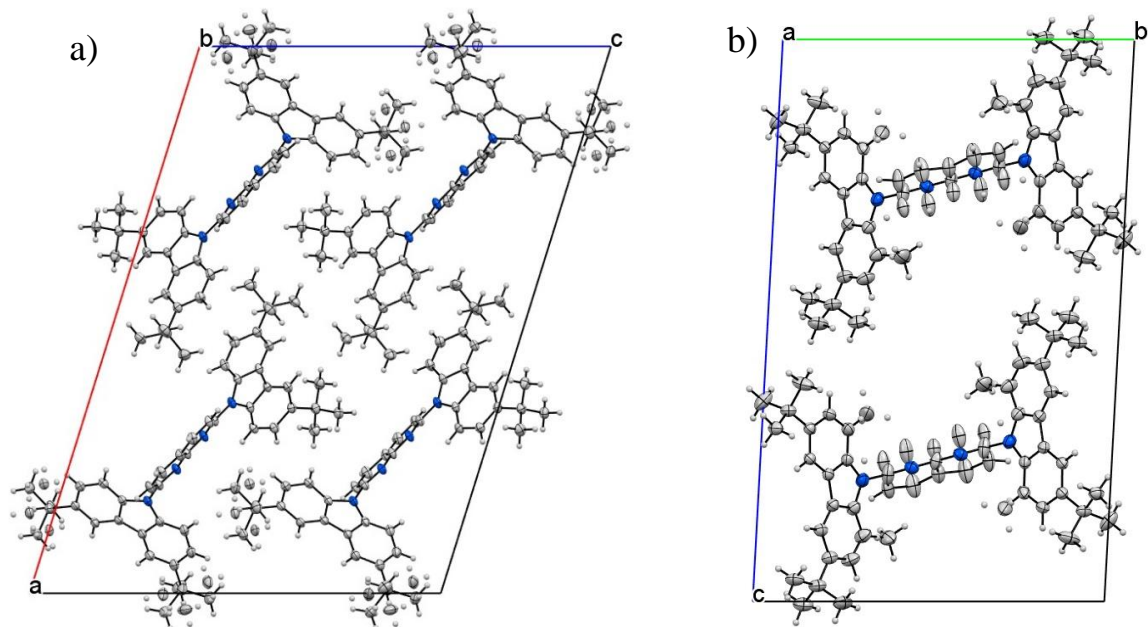

**Figure S1.** Illustration of unit cell contents obtained by XRD measurements: a) view down crystallographic axis *b* of **tCz-ND**; b) view down crystallographic axis *a* of **MetCz-ND**. Thermal ellipsoids are at 50% probability level.

**Table S1.** Crystallographic data of **tCz-ND** and **MetCz-ND** crystals.

| <b>Compound</b>                           | <b>tCz-ND</b>                                  | <b>MetCz-ND</b>                                |
|-------------------------------------------|------------------------------------------------|------------------------------------------------|
| Formula                                   | C <sub>48</sub> H <sub>52</sub> N <sub>4</sub> | C <sub>50</sub> H <sub>56</sub> N <sub>4</sub> |
| $\rho_{calc./g\ cm^{-3}}$                 | 1.181                                          | 0.963 + solvent                                |
| $\mu/mm^{-1}$                             | 0.524                                          | 0.425                                          |
| Formula Weight                            | 684.93                                         | 712.98                                         |
| Colour                                    | yellow                                         | yellow                                         |
| Shape                                     | needle                                         | needle                                         |
| Size/mm <sup>3</sup>                      | 0.51×0.05×0.04                                 | 0.70×0.06×0.05                                 |
| T/K                                       | 100.00(13)                                     | 99.99(11)                                      |
| Crystal System                            | monoclinic                                     | triclinic                                      |
| Space Group                               | <i>P</i> 2 <sub>1</sub> / <i>c</i>             | <i>P</i> -1                                    |
| <i>a</i> /Å                               | 30.1012(6)                                     | 5.94900(10)                                    |
| <i>b</i> /Å                               | 6.18300(10)                                    | 16.31420(10)                                   |
| <i>c</i> /Å                               | 21.6823(4)                                     | 25.8129(2)                                     |
| $\alpha/^\circ$                           | 90                                             | 93.0010(10)                                    |
| $\beta/^\circ$                            | 107.347(2)                                     | 90.0120(10)                                    |
| $\gamma/^\circ$                           | 90                                             | 100.5010(10)                                   |
| <i>V</i> /Å <sup>3</sup>                  | 3851.87(13)                                    | 2459.77(5)                                     |
| <i>Z</i>                                  | 4                                              | 2                                              |
| <i>Z'</i>                                 | 1                                              | 1                                              |
| Wavelength/Å                              | 1.54184                                        | 1.54184                                        |
| Radiation type                            | Cu K <sub><math>\alpha</math></sub>            | Cu K <sub><math>\alpha</math></sub>            |
| $\theta_{min}/^\circ$                     | 3.076                                          | 2.759                                          |
| $\theta_{max}/^\circ$                     | 71.879                                         | 76.681                                         |
| Measured Reflections                      | 21090                                          | 44637                                          |
| Independent Reflections                   | 7334                                           | 9455                                           |
| Reflections with <i>I</i> > 2( <i>I</i> ) | 6200                                           | 7558                                           |
| <i>R</i> <sub>int</sub>                   | 0.0245                                         | 0.0319                                         |
| Parameters                                | 544                                            | 570                                            |
| Restraints                                | 0                                              | 0                                              |
| Largest Peak                              | 0.212                                          | 0.402                                          |
| Deepest Hole                              | -0.202                                         | -0.194                                         |
| Goodness-of-fit                           | 1.039                                          | 1.066                                          |
| <i>wR</i> <sub>2</sub> (all data)         | 0.1115                                         | 0.1792                                         |
| <i>wR</i> <sub>2</sub>                    | 0.1066                                         | 0.1709                                         |
| <i>R</i> <sub>1</sub> (all data)          | 0.0497                                         | 0.0660                                         |
| <i>R</i> <sub>1</sub>                     | 0.0410                                         | 0.0568                                         |

## Thermal stability

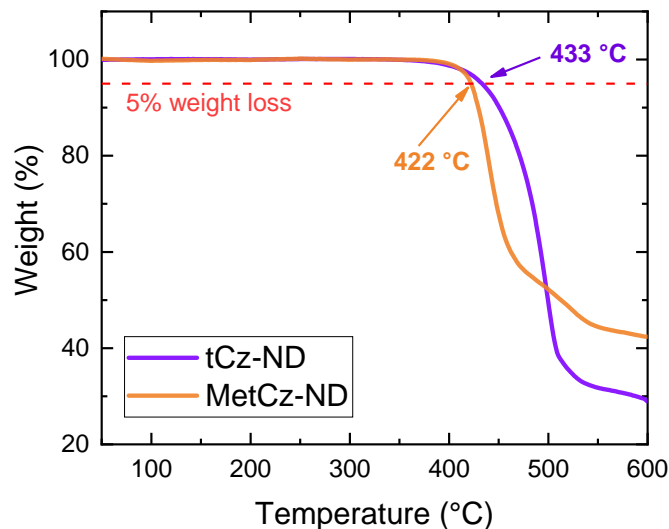

**Figure S2.** TGA traces of **tCz-ND** and **MetCz-ND** recorded at 10 K/min heating rate in N<sub>2</sub> environment. Thermal decomposition temperatures corresponding to 5% weight loss are indicated.

## DFT calculations

Ground state geometries were optimized in vacuum by employing density functional theory (DFT) with B3LYP functional at 6-31G(d) basis set as implemented in Gaussian 09W software.<sup>6</sup> Time dependent DFT method at the same basis set level was used to calculate ground to excited state transition energies ( $E$ ), oscillator strengths ( $f$ ) and to obtain HOMO and LUMO orbitals.

**Table S2.** Data obtained from TD-DFT calculations at B3LYP/6-31G(d) level by using optimized ground state geometry at the same basis set.

| Compound        | $E_{S_0 \rightarrow S_1}$<br>(eV) | $f$<br>[ $S_0 \rightarrow S_1$ ] | $E_{S_0 \rightarrow S_2}$<br>(eV) | $f$<br>[ $S_0 \rightarrow S_2$ ] | $E_{S_0 \rightarrow T_1}$<br>(eV) | $E_{S_0 \rightarrow T_2}$<br>(eV) | $\angle$ tCz/ND <sup>a</sup><br>(deg) | $\Delta E_{S_1-T_1}$<br>(eV) |
|-----------------|-----------------------------------|----------------------------------|-----------------------------------|----------------------------------|-----------------------------------|-----------------------------------|---------------------------------------|------------------------------|
| <b>tCz-ND</b>   | 2.9056                            | 0.4963                           | 3.1734                            | 0.0274                           | 2.5559                            | 2.7612                            | 31                                    | 0.3497                       |
| <b>MetCz-ND</b> | 2.7041                            | 0.3100                           | 2.8937                            | 0.0241                           | 2.465                             | 2.6106                            | 55                                    | 0.2391                       |

<sup>a</sup> dihedral angle between carbazole and naphthyridine

## Photophysical properties

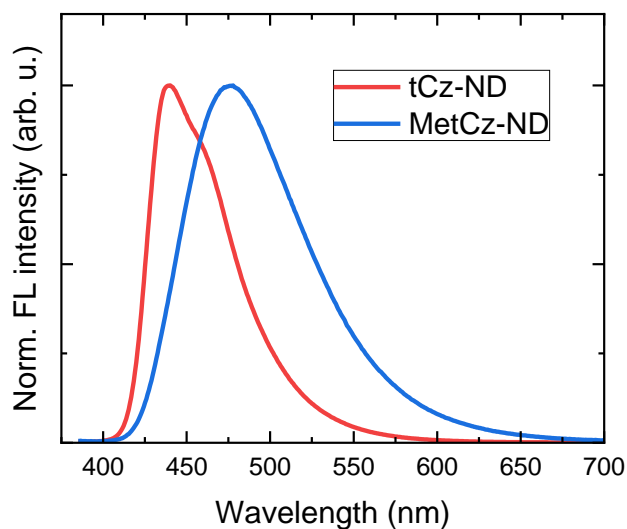

**Figure S3.** FL spectra of naphthyridine derivatives in toluene solutions ( $10^{-5}$  mol/l) at room temperature.

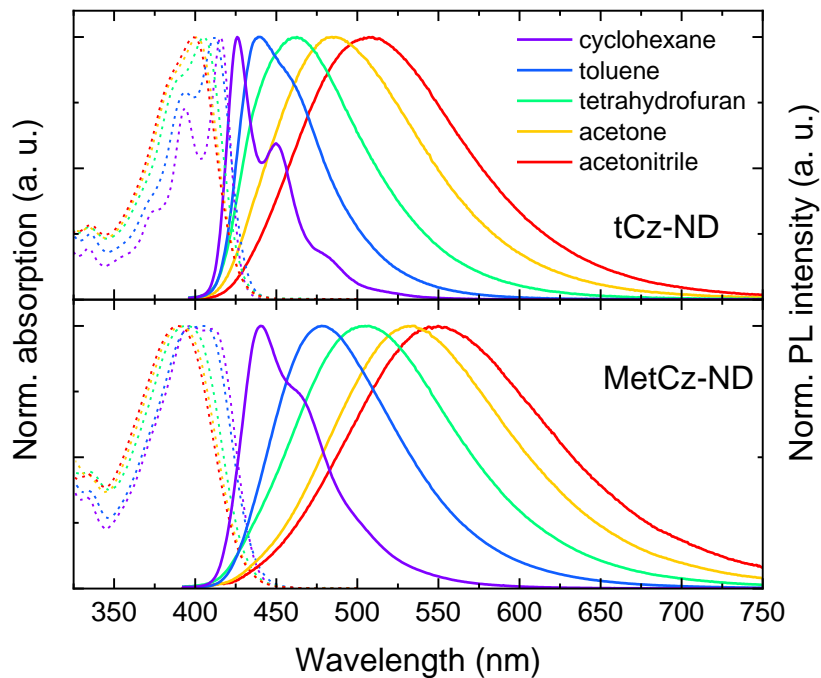

**Figure S4.** Absorption and FL spectra of naphthyridine derivatives in solvents of different polarity. Solution concentration  $c = 10^{-5}$  mol/l.

**Table S3.** Photophysical properties of naphthyridine compounds in toluene ( $10^{-5}$  mol/l) and mCP host (7 wt%)

|                 | Compound        | $\lambda_{\max}$<br>(nm) | $\Phi_{\text{FL}}$ | $\Phi_{\text{DF}}/\Phi_{\text{PF}}$ | $\tau_{\text{PF}}$<br>(ns) | $\tau_{\text{DF}}$<br>( $\mu\text{s}$ ) | $k_r$<br>( $10^6 \text{ s}^{-1}$ ) | $k_{\text{rISC}}^{\text{a}}$<br>( $10^6 \text{ s}^{-1}$ ) | $k_{\text{ISC}}^{\text{a}}$<br>( $10^7 \text{ s}^{-1}$ ) |
|-----------------|-----------------|--------------------------|--------------------|-------------------------------------|----------------------------|-----------------------------------------|------------------------------------|-----------------------------------------------------------|----------------------------------------------------------|
| Toluene         | <b>tCz-ND</b>   | 440                      | 0.53               | 0.26                                | 4.0                        | 2.8                                     | 104.2                              | 0.16                                                      | 14.4                                                     |
|                 | <b>MetCz-ND</b> | 477                      | 0.64               | 0.49                                | 12.1                       | 1.1                                     | 35.4                               | 0.81                                                      | 4.7                                                      |
| 7 wt%<br>In mCP | <b>tCz-ND</b>   | 452                      | 0.76               | 2.3                                 | 5.2                        | 8.8                                     | 44.2                               | 0.34                                                      | 14.8                                                     |
|                 | <b>MetCz-ND</b> | 478                      | 0.86               | 2.44                                | 8.3                        | 3.1                                     | 30.1                               | 1.06                                                      | 9.0                                                      |

<sup>a</sup> ISC ( $k_{\text{ISC}}$ ) and rISC ( $k_{\text{rISC}}$ ) rates were calculated according to the previously described procedures<sup>7</sup> assuming that non-radiative decay occurs mainly from the triplet states as determined from the data in Figure 4.



## OLED performance

**Table S4.** Main parameters of vacuum- and solution-processed OLEDs based on the naphthyridine TADF emitters (7 wt% in mCP).

| Tech. | Emitter  | $V_{on}$ (V) | Maximum values |                |           |           | @100 $cd/m^2$ |         |           |           | @1000 $cd/m^2$ |         |           |           | CIE (x, y) | $\lambda_{max}$ (nm) | FWHM (nm) |
|-------|----------|--------------|----------------|----------------|-----------|-----------|---------------|---------|-----------|-----------|----------------|---------|-----------|-----------|------------|----------------------|-----------|
|       |          |              | EQE (%)        | L ( $cd/m^2$ ) | CE (cd/A) | LE (lm/W) | Voltage (V)   | EQE (%) | CE (cd/A) | LE (lm/W) | Voltage (V)    | EQE (%) | CE (cd/A) | LE (lm/W) |            |                      |           |
| Vac   | tCz-ND   | 3.25         | 17.01          | 8424           | 22.17     | 19.88     | 4.50          | 9.89    | 13.41     | 9.44      | 6.20           | 7.00    | 9.30      | 4.72      | 0.14, 0.16 | 459                  | 66        |
| Sol   | tCz-ND   | 4.3          | 13.45          | 6840           | 17.26     | 10.24     | 6.50          | 12.11   | 15.84     | 7.64      | 8.55           | 7.80    | 9.80      | 3.48      | 0.15, 0.14 | 452                  | 66        |
| Vac   | MetCz-ND | 3.25         | 17.60          | 21459          | 31.98     | 23.60     | 4.50          | 14.43   | 25.46     | 17.76     | 5.87           | 12.50   | 24.72     | 13.2      | 0.18, 0.32 | 481                  | 88        |
| Sol   | MetCz-ND | 3.4          | 11.66          | 23028          | 23.84     | 11.76     | 4.87          | 7.5     | 14.75     | 9.80      | 6.12           | 11.00   | 22.80     | 11.6      | 0.16, 0.29 | 479                  | 80        |

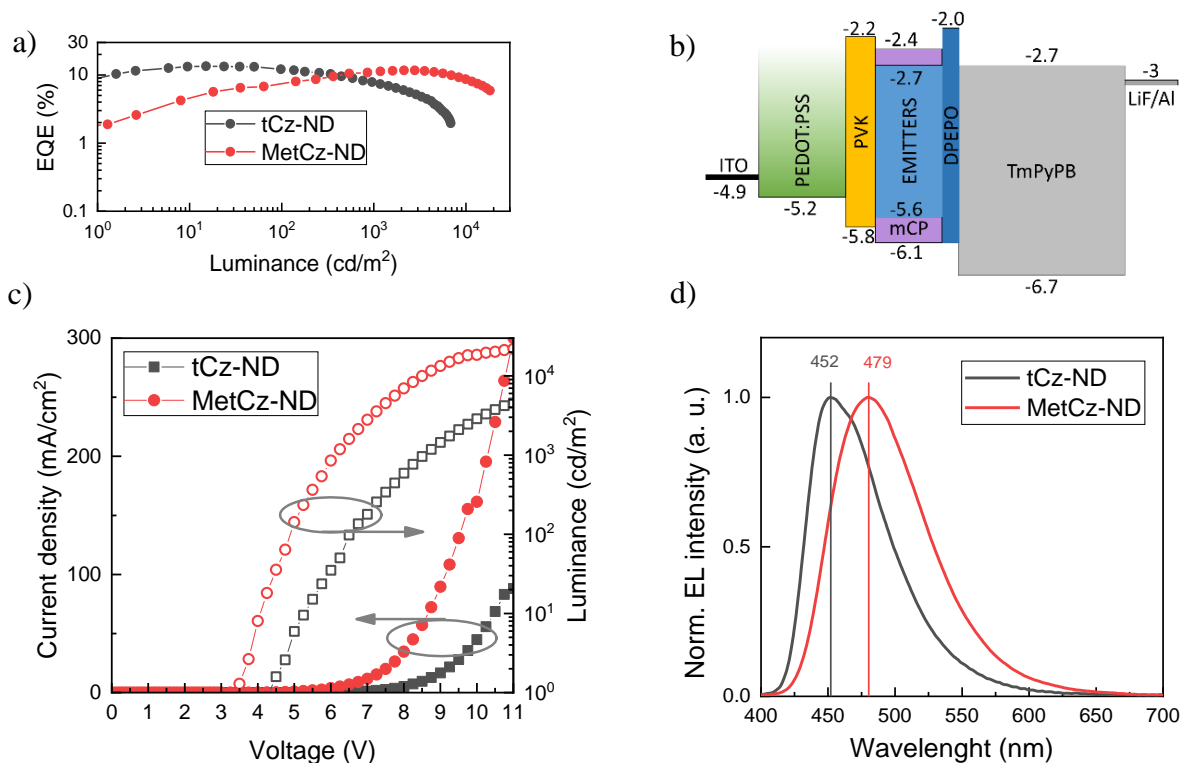

**Figure S5.** Characteristics of solution-processed OLEDs based on the naphthyridine TADF emitters dispersed in mCP host at 7 wt%: a) EQE vs luminance, b) energy level diagram, c) current density and luminance vs applied voltage, d) normalized electroluminescence spectra.

**Table S5.** Summarized main EL parameters of the best performing deep-blue ( $\lambda_{\text{max}} < 460$  nm) TADF OLEDs reported in literature.

| Compound                                   | $\lambda_{\text{max}}$<br>(nm) | CIE (x; y)   | FWHM<br>(nm) | EQE <sub>max</sub><br>(%) | EQE (%)<br>@100 cd/m <sup>2</sup> | EQE (%)<br>@1000 cd/m <sup>2</sup> | Reference |
|--------------------------------------------|--------------------------------|--------------|--------------|---------------------------|-----------------------------------|------------------------------------|-----------|
| <b>tCz-ND<br/>(vacuum<br/>processed)</b>   | 459                            | (0.14; 0.16) | 66           | 17.0                      | 9.9                               | 7.1                                | This work |
| <b>tCz-ND<br/>(solution<br/>processed)</b> | 452                            | (0.15; 0.14) | 66           | 13.45                     | 12.11                             | 7.8                                | This work |
| <b>34CzBN</b>                              | 458                            | (0.14; 0.14) | 63           | 15.2                      | 7.3                               | -                                  | 8         |
| <b>DCzBN2</b>                              | 436                            | (0.15; 0.07) | 66           | 7.7                       | -                                 | -                                  | 9         |
| <b>DCzBN3</b>                              | 428                            | (0.16; 0.06) | 65           | 10.3                      | -                                 | -                                  | 9         |
| <b>CNICCz</b>                              | 449                            | (0.15; 0.08) | 56           | 12.4                      | 6.4                               | -                                  | 10        |
| <b>CNICtCz</b>                             | 456                            | (0.14; 0.13) | 60           | 16.0                      | 10.7                              | -                                  | 10        |
| <b>DTTSAF</b>                              | 448                            | (0.15; 0.10) | 68           | 6.2                       | ~4.6                              | -                                  | 11        |
| <b>BDTPDDA</b>                             | 456                            | (0.14; 0.12) | 56           | 8.5                       | ~6.6                              | 4.6                                | 11        |
| <b>ICzAc</b>                               | 454                            | (0.15; 0.09) | 56           | 13.7                      | -8                                | -                                  | 12        |
| <b><i>i</i>-2CzdOXDMe</b>                  | 452                            | (0.17; 0.17) | 85           | 11.8                      | 1.3                               | -                                  | 13        |
| <b>DPAc-<br/>DdtCzBN</b>                   | 456                            | (0.16; 0.15) | 67           | 23.1                      | 18.3                              | -                                  | 14        |
| <b>TXAZ</b>                                | 456                            | (0.15; 0.13) | 69           | 16.0                      | 8.48                              | -                                  | 15        |
| <b>pDTCz-3DPyS</b>                         | 452                            | (0.15; 0.13) | ~75          | 13.4                      | 4.5                               | -                                  | 16        |
| <b>CzMeoB</b>                              | 455                            | (0.14; 0.10) | ~50          | 16.1                      | 12.4                              | -                                  | 17        |
| <b>TDBA-Ac</b>                             | 448                            | (0.15; 0.06) | 48           | 21.5                      | ~18                               | 9.6                                | 18        |
| <b>DMAC2PTO</b>                            | 448                            | (0.15; 0.11) | 52           | 15.2                      | ~5                                | -                                  | 19        |
| <b>PhICzACD</b>                            | 454                            | (0.16; 0.12) | 51           | 17.0                      | 6.4                               | -                                  | 20        |
| <b>DtBuAc-DBT</b>                          | 455                            | (0.13; 0.13) | 84           | 10.5                      | 9.8                               | -                                  | 21        |
| <b>OBA-O</b>                               | 446                            | (0.17; 0.17) | ~100         | 17.8                      | 15.5                              | 8.5                                | 22        |
| <b>Cz-TRZ4</b>                             | 446                            | (0.15; 0.10) | ~70          | 18.3                      | -                                 | ~9                                 | 23        |
| <b>tCbz-mPYRs</b>                          | 441                            | (0.16; 0.12) | 80           | 8.7                       | 2.0                               | -                                  | 24        |
| <b>DCzTrz</b>                              | 459                            | (0.15, 0.15) | ~60          | 17.5                      | ~16                               | ~11                                | 25        |
| <b>DMTDAc</b>                              | 451                            | (0.15; 0.13) | 65           | 19.8                      | 19.8                              | ~12                                | 26        |
| <b>DMOC-DPS</b>                            | 460                            | (0.16; 0.16) | ~80          | 14.5                      | 9.0                               | 3.7                                | 27        |
| <b>Ac-3MHPM</b>                            | 451                            | (0.16; 0.15) | ~75          | 17.8                      | 10.4                              | -                                  | 28        |
| <b>FA-TA</b>                               | 454                            | (0.15; 0.13) | ~70          | 11.2                      | -                                 | -                                  | 29        |
| <b>3b</b>                                  | 436                            | (0.16; 0.08) | ~60          | 8.5                       | 8.4                               | 7.7                                | 30        |
| <b>2CzdOXDPh</b>                           | 455                            | (0.16; 0.15) | 75           | 6.8                       | 2                                 | 1.4                                | 31        |
| <b>TN4T-PCZ</b>                            | ~410                           | (0.16; 0.03) | ~70          | 20.4                      | ~12                               | 20                                 | 32        |

## References

- 1 G. R. Newkome, S. J. Garbis, V. K. Majestic, F. R. Fronczek and G. Chiarilc, *J. Org. Chem.*, 1981, **46**, 833–839.
- 2 C. Maeda, T. Todaka, T. Ueda and T. Ema, *Chem. - A Eur. J.*, 2016, **22**, 7508–7513.
- 3 O. V. Dolomanov, L. J. Bourhis, R. J. Gildea, J. A. K. Howard and H. Puschmann, *J. Appl. Crystallogr.*, 2009, **42**, 339–341.
- 4 G. M. Sheldrick, *Acta Crystallogr. Sect. A Found. Crystallogr.*, 2015, **71**, 3–8.
- 5 G. M. Sheldrick, *Acta Crystallogr. Sect. C Struct. Chem.*, 2015, **71**, 3–8.
- 6 M. J. Frisch, G. W. Trucks, H. B. Schlegel, G. E. Scuseria, M. A. Robb, J. R. Cheeseman, G. Scalmani, V. Barone, G. A. Petersson, H. Nakatsuji, X. Li, M. Caricato, A. Marenich, J. Bloino, B. G. Janesko, R. Gomperts, B. Mennucci, H. P. Hratchian, J. V. Ortiz, A. F. Izmaylov, J. L. Sonnenberg, D. Williams-Young, F. Ding, F. Lipparini, F. Egidi, J. Goings, B. Peng, A. Petrone, T. Henderson, D. Ranasinghe, V. G. Zakrzewski, J. Gao, N. Rega, G. Zheng, W. Liang, M. Hada, M. Ehara, K. Toyota, R. Fukuda, J. Hasegawa, M. Ishida, T. Nakajima, Y. Honda, O. Kitao, H. Nakai, T. Vreven, K. Throssell, J. J. A. Montgomery, J. E. Peralta, F. Ogliaro, M. Bearpark, J. J. Heyd, E. Brothers, K. N. Kudin, V. N. Staroverov, T. Keith, R. Kobayashi, J. Normand, K. Raghavachari, A. Rendell, J. C. Burant, S. S. Iyengar, J. Tomasi, M. Cossi, J. M. Millam, M. Klene, C. Adamo, R. Cammi, J. W. Ochterski, R. L. Martin, K. Morokuma, O. Farkas, J. B. Foresman and D. J. Fox, 2016.
- 7 G. Kreiza, D. Banevičius, J. Jovaišaitė, K. Maleckaitė, D. Gudeika, D. Volyniuk, J. V. Gražulevičius, S. Juršėnas and K. Kazlauskas, *J. Mater. Chem. C*, 2019, **7**, 11522–11531.
- 8 R. K. Konidena, K. H. Lee and J. Y. Lee, *J. Mater. Chem. C*, 2019, **7**, 9908–9916.
- 9 C. Chan, L. Cui, J. U. Kim, H. Nakanotani and C. Adachi, *Adv. Funct. Mater.*, 2018, **28**, 1706023.
- 10 Y. Im, S. H. Han and J. Y. Lee, *J. Mater. Chem. C*, 2018, **6**, 5012–5017.
- 11 S. J. Woo, Y. Kim, M. J. Kim, J. Y. Baek, S. K. Kwon, Y. H. Kim and J. J. Kim, *Chem. Mater.*, 2018, **30**, 857–863.
- 12 J. A. Seo, Y. Im, S. H. Han, C. W. Lee and J. Y. Lee, *ACS Appl. Mater. Interfaces*, 2017, **9**, 37864–37872.
- 13 Z. Li, W. Li, C. Keum, E. Archer, B. Zhao, A. M. Z. Slawin, W. Huang, M. C. Gather, I. D. W. Samuel and E. Zysman-Colman, *J. Phys. Chem. C*, 2019, **123**, 24772–24785.
- 14 Z. Cheng, Z. Li, Y. Xu, J. Liang, C. Lin, J. Wei and Y. Wang, *ACS Appl. Mater. Interfaces*, 2019, **11**, 28096–28105.
- 15 S. J. Woo, Y. Kim, S. K. Kwon, Y. H. Kim and J. J. Kim, *ACS Appl. Mater. Interfaces*, 2019, **11**, 7199–7207.
- 16 P. Rajamalli, D. Chen, W. Li, I. D. W. Samuel, D. B. Cordes, A. M. Z. Slawin and E. Zysman-Colman, *J. Mater. Chem. C*, 2019, **7**, 6664–6671.
- 17 Y. H. Lee, S. Park, J. Oh, S.-J. Woo, A. Kumar, J.-J. Kim, J. Jung, S. Yoo and M. H. Lee, *Adv. Opt. Mater.*, 2018, **6**, 1800385.
- 18 D. H. Ahn, S. W. Kim, H. Lee, I. J. Ko, D. Karthik, J. Y. Lee and J. H. Kwon, *Nat. Photonics*, 2019, **13**, 540–546.
- 19 S. Sun, R. Guo, Q. Zhang, X. Lv, P. Leng, Y. Wang, Z. Huang and L. Wang, *Dye. Pigment.*,

- 2020, **178**, 108367.
- 20 V. V. Patil, K. H. Lee and J. Y. Lee, *Dye. Pigment.*, 2020, **174**, 108070.
- 21 R. Huang, N. A. Kukhta, J. S. Ward, A. Danos, A. S. Batsanov, M. R. Bryce and F. B. Dias, *J. Mater. Chem. C*, 2019, **7**, 13224–13234.
- 22 D. Song, Y. Yu, L. Yue, D. Zhong, Y. Zhang, X. Yang, Y. Sun, G. Zhou and Z. Wu, *J. Mater. Chem. C*, 2019, **7**, 11953–11963.
- 23 L.-S. Cui, H. Nomura, Y. Geng, J. U. Kim, H. Nakanotani and C. Adachi, *Angew. Chemie Int. Ed.*, 2017, **56**, 1571–1575.
- 24 T. Serevičius, R. Skaisgiris, I. Fiodorova, V. Steckis, J. Dodonova, D. Banevičius, K. Kazlauskas, S. Juršėnas and S. Tumkevičius, *Org. Electron.*, 2020, 105723.
- 25 M. Kim, S. K. Jeon, S.-H. Hwang and J. Y. Lee, *Adv. Mater.*, 2015, **27**, 2515–2520.
- 26 I. Lee and J. Y. Lee, *Org. Electron.*, 2016, **29**, 160–164.
- 27 S. Wu, M. Aonuma, Q. Zhang, S. Huang, T. Nakagawa, K. Kuwabara and C. Adachi, *J. Mater. Chem. C*, 2014, **2**, 421–424.
- 28 R. Komatsu, T. Ohsawa, H. Sasabe, K. Nakao, Y. Hayasaka and J. Kido, *ACS Appl. Mater. Interfaces*, 2017, **9**, 4742–4749.
- 29 Y. Wada, S. Kubo and H. Kaji, *Adv. Mater.*, 2018, **30**, 1705641.
- 30 N. Jürgensen, A. Kretzschmar, S. Höfle, J. Freudenberg, U. H. F. Bunz and G. Hernandez-Sosa, *Chem. Mater.*, 2017, **29**, 9154–9161.
- 31 M. Y. Wong, S. Krotkus, G. Copley, W. Li, C. Murawski, D. Hall, G. J. Hedley, M. Jaricot, D. B. Cordes, A. M. Z. Slawin, Y. Olivier, D. Beljonne, L. Muccioli, M. Moral, J. C. Sancho-Garcia, M. C. Gather, I. D. W. Samuel and E. Zysman-Colman, *ACS Appl. Mater. Interfaces*, 2018, **10**, 33360–33372.
- 32 X. Liang, H. B. Han, Z. P. Yan, L. Liu, Y. X. Zheng, H. Meng and W. Huang, *New J. Chem.*, 2018, **42**, 4317–4323.
